# Supplementary material for: Reactivation of Mthfd2 during heart failure drives cardiac remodeling
Source: Research Square preprint supplement (doi:10.21203/rs.3.rs-8325105/v1), 2025-12-17

**Supplementary Information**

**Reactivation of *Mthfd2* during heart failure drives cardiac remodeling**

Yue Lu, Na Yang, Beiduo Tian, Jiawei Wu, Hailei Sun, Yaxin Song, Chenlu Yuan, Yongning Lv, Haizhu Zhang, Zihao Ren, Dan Hu, Buyun Liu, Chao Gao, Xinya Li, Tao Li, Yu-Chen Wang, and Yang Cao

TABLE OF CONTENTS

1. Supplementary Tables 1-6

2. Supplementary Figure 1

**Supplementary Table 1**

Primers used for mouse genotyping


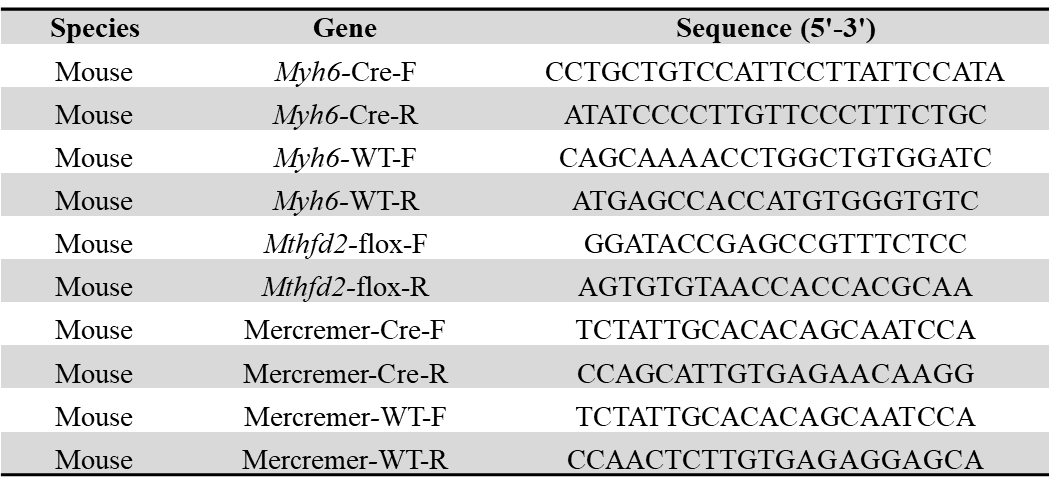


**Supplementary Table 2**

Clinical characteristics of NHF and HFpEF patients


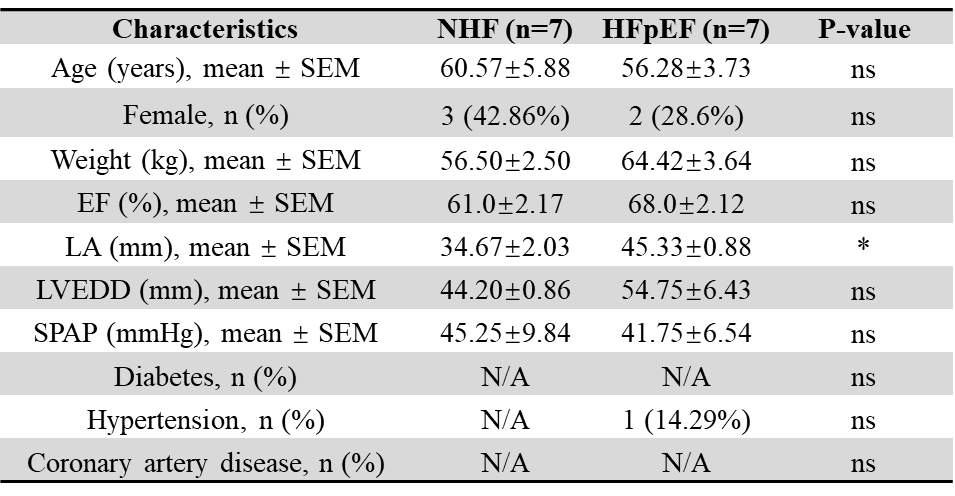


ns, not significant. *P<0.05 by Student’s t test. NHF. NHF, non-heart failure. HFpEF, heart failure with preserved ejection fraction. EF, ejection fraction. LA, left atrium. LVEDD, left ventricular end-diastolic diameter. SPAP, systolic pulmonary artery pressure.

**Supplementary Table 3**

Echocardiography data of the groups of mice used in the studies


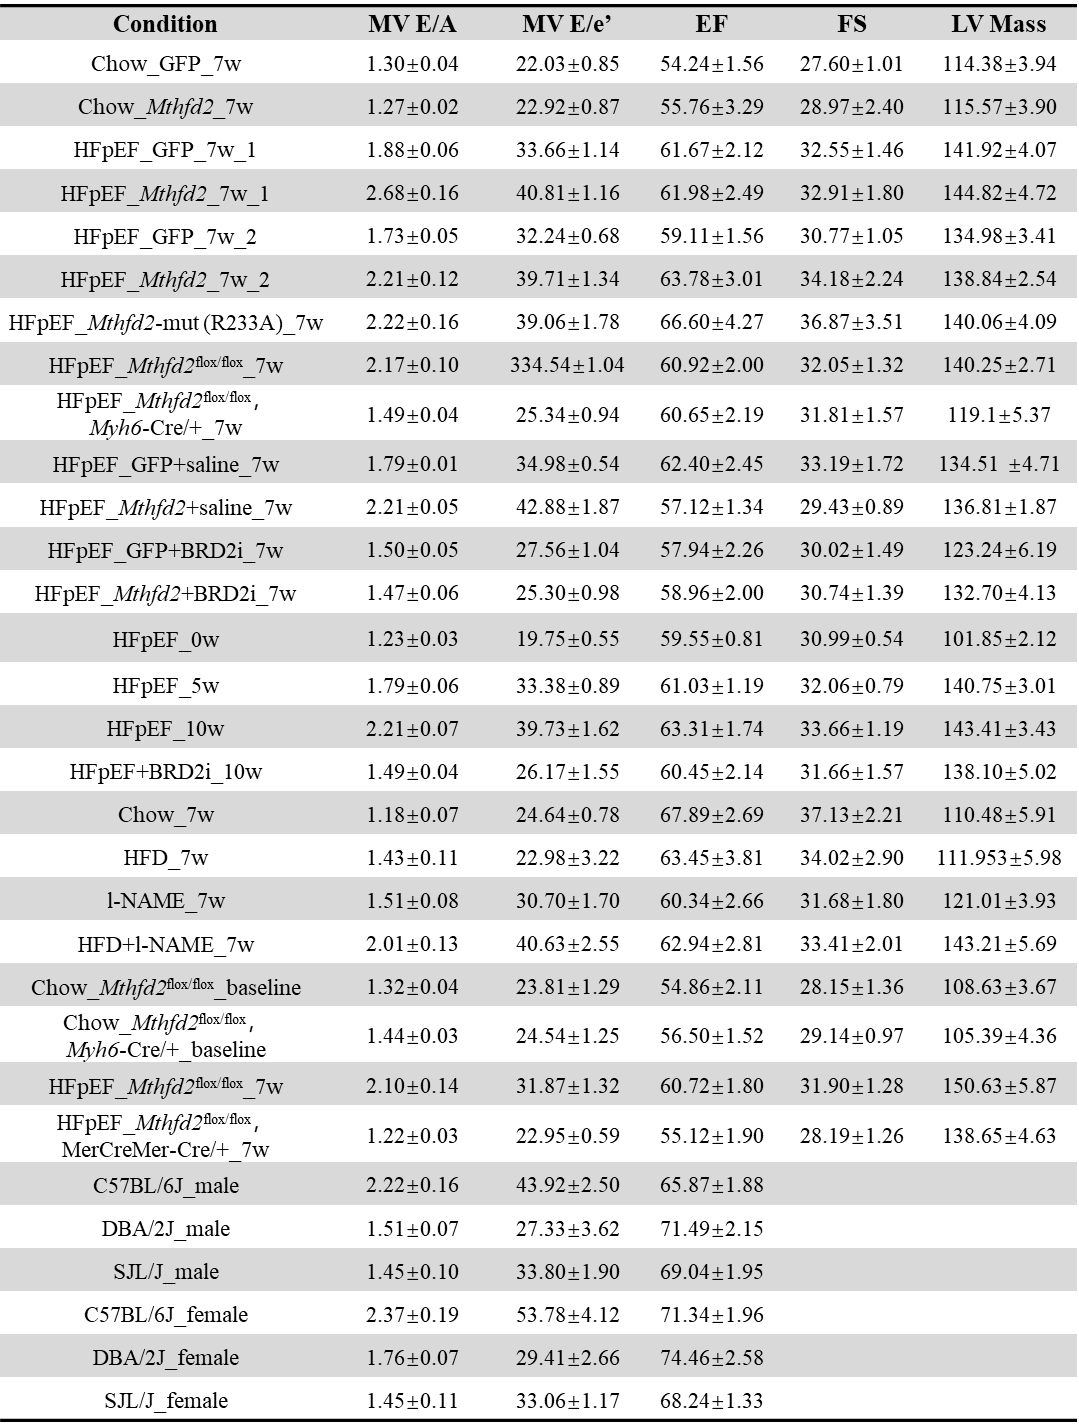


**Supplementary Table 4**

Primers used for quantitative RT-PCR


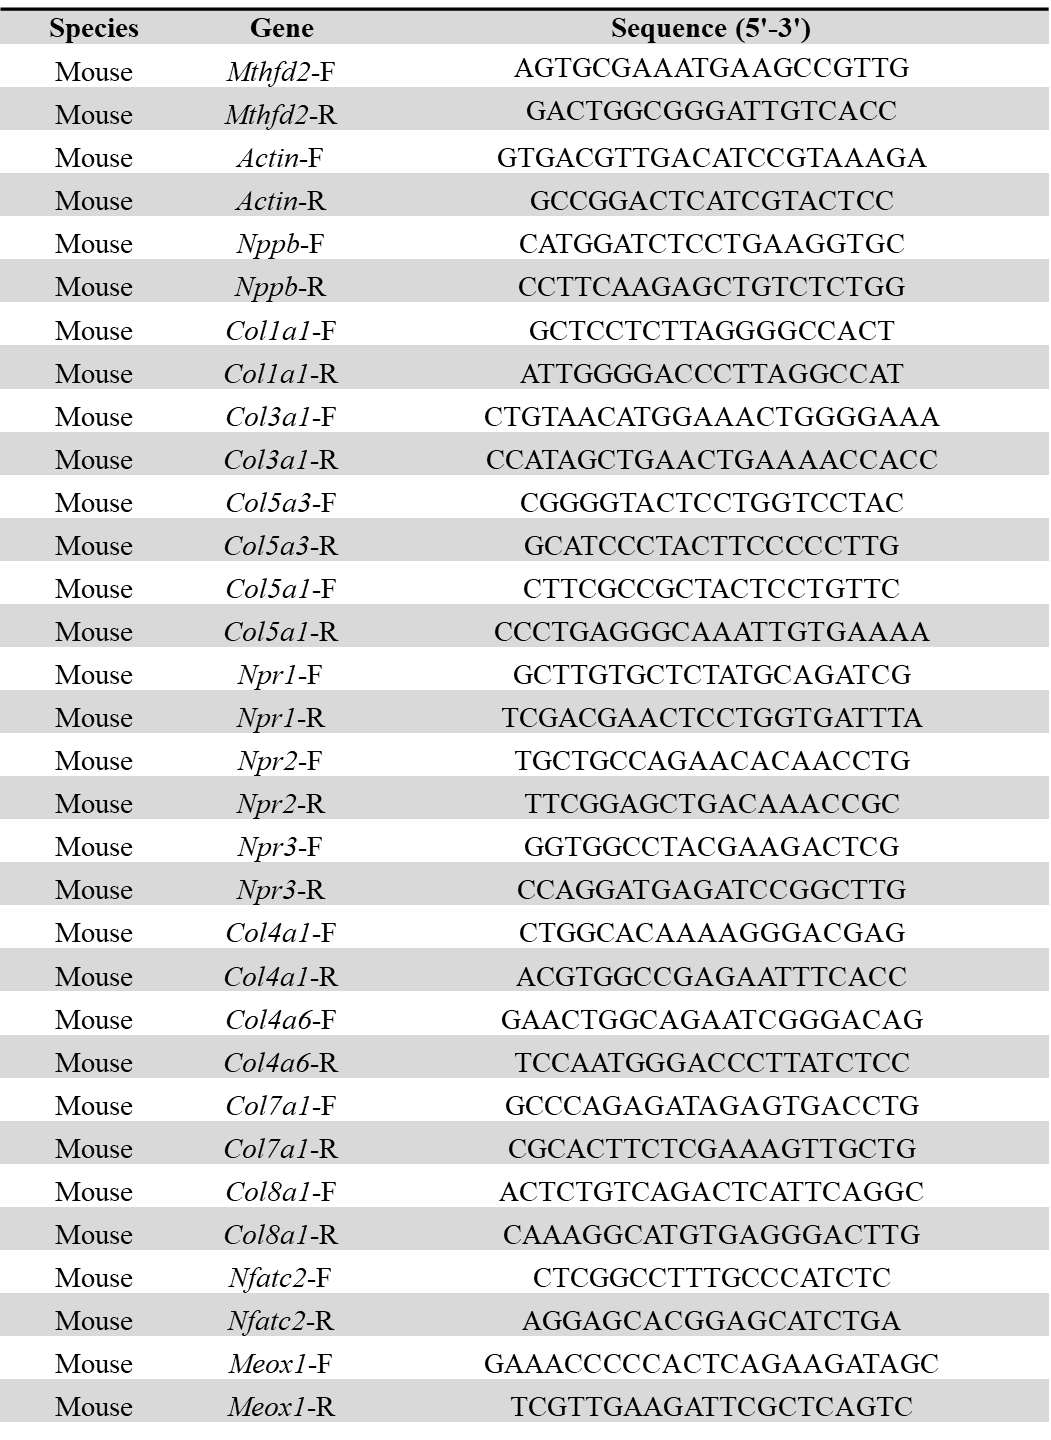


**Supplementary Table 4 (continued)**

Primers used for quantitative RT-PCR


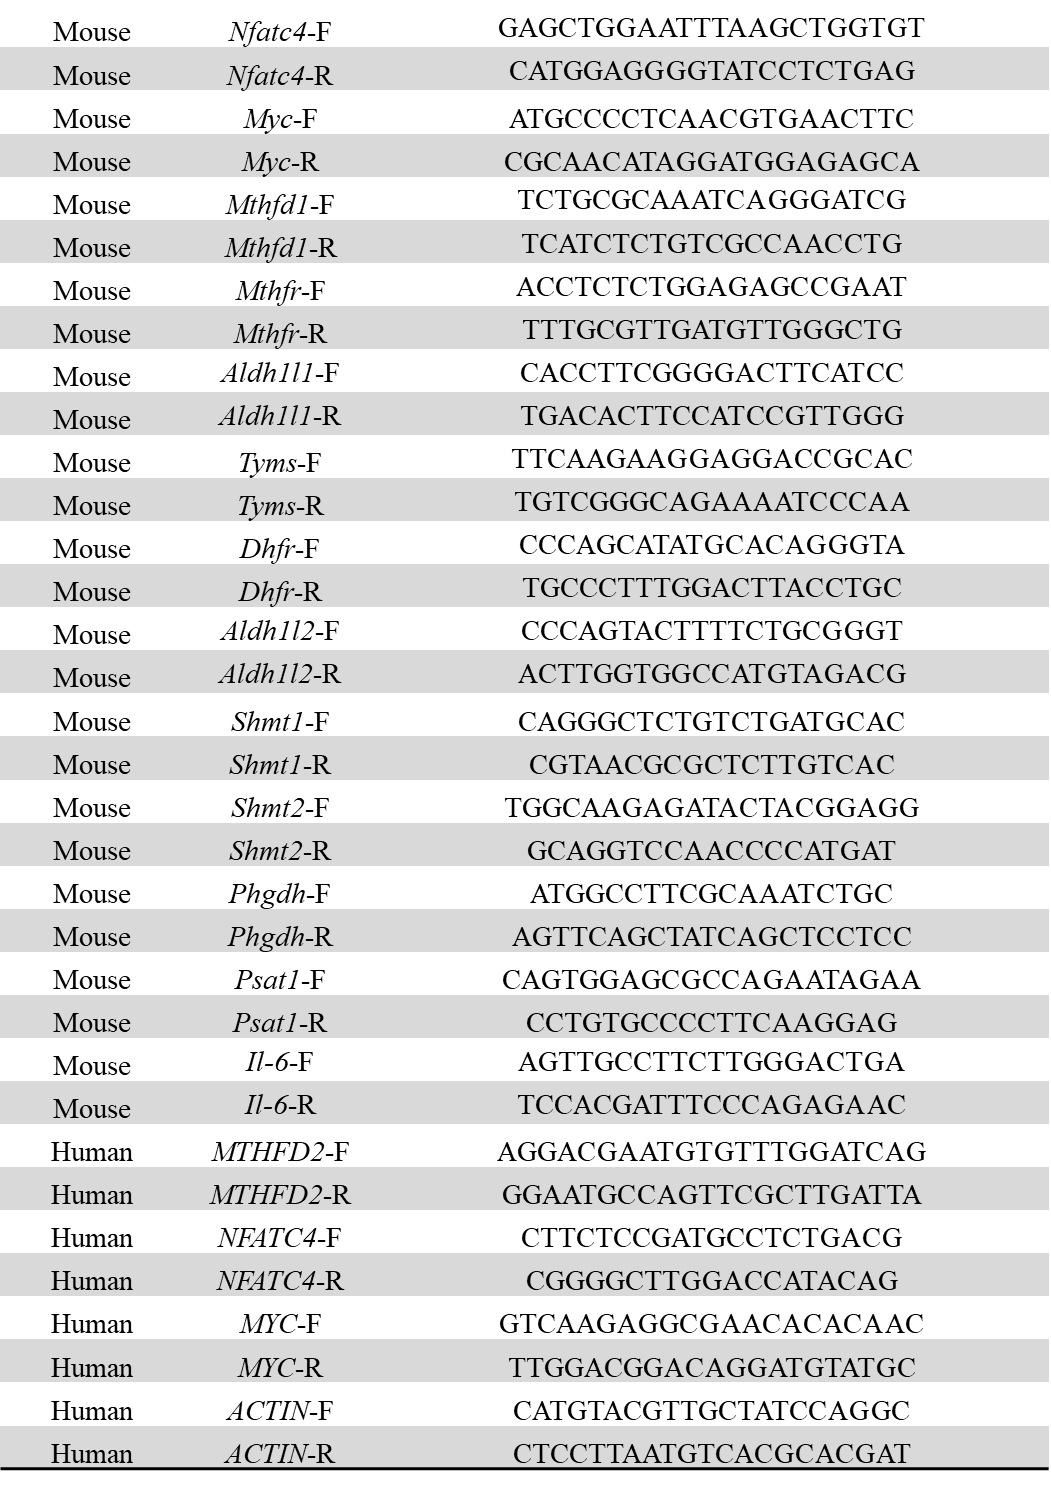


**Supplementary Table 5**

Primers used for Cut & Tag-qPCR


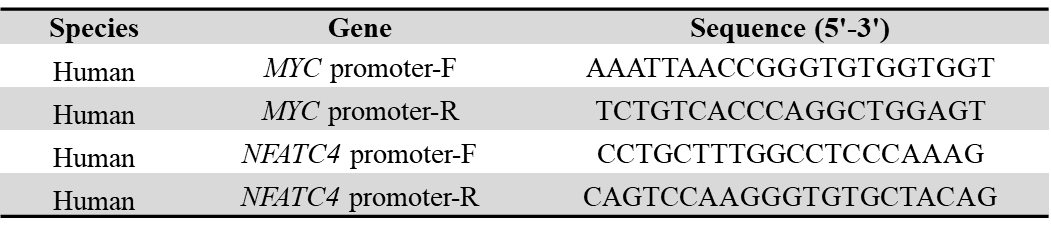


**Supplementary Table 6**

Primers used for ChIP-qPCR


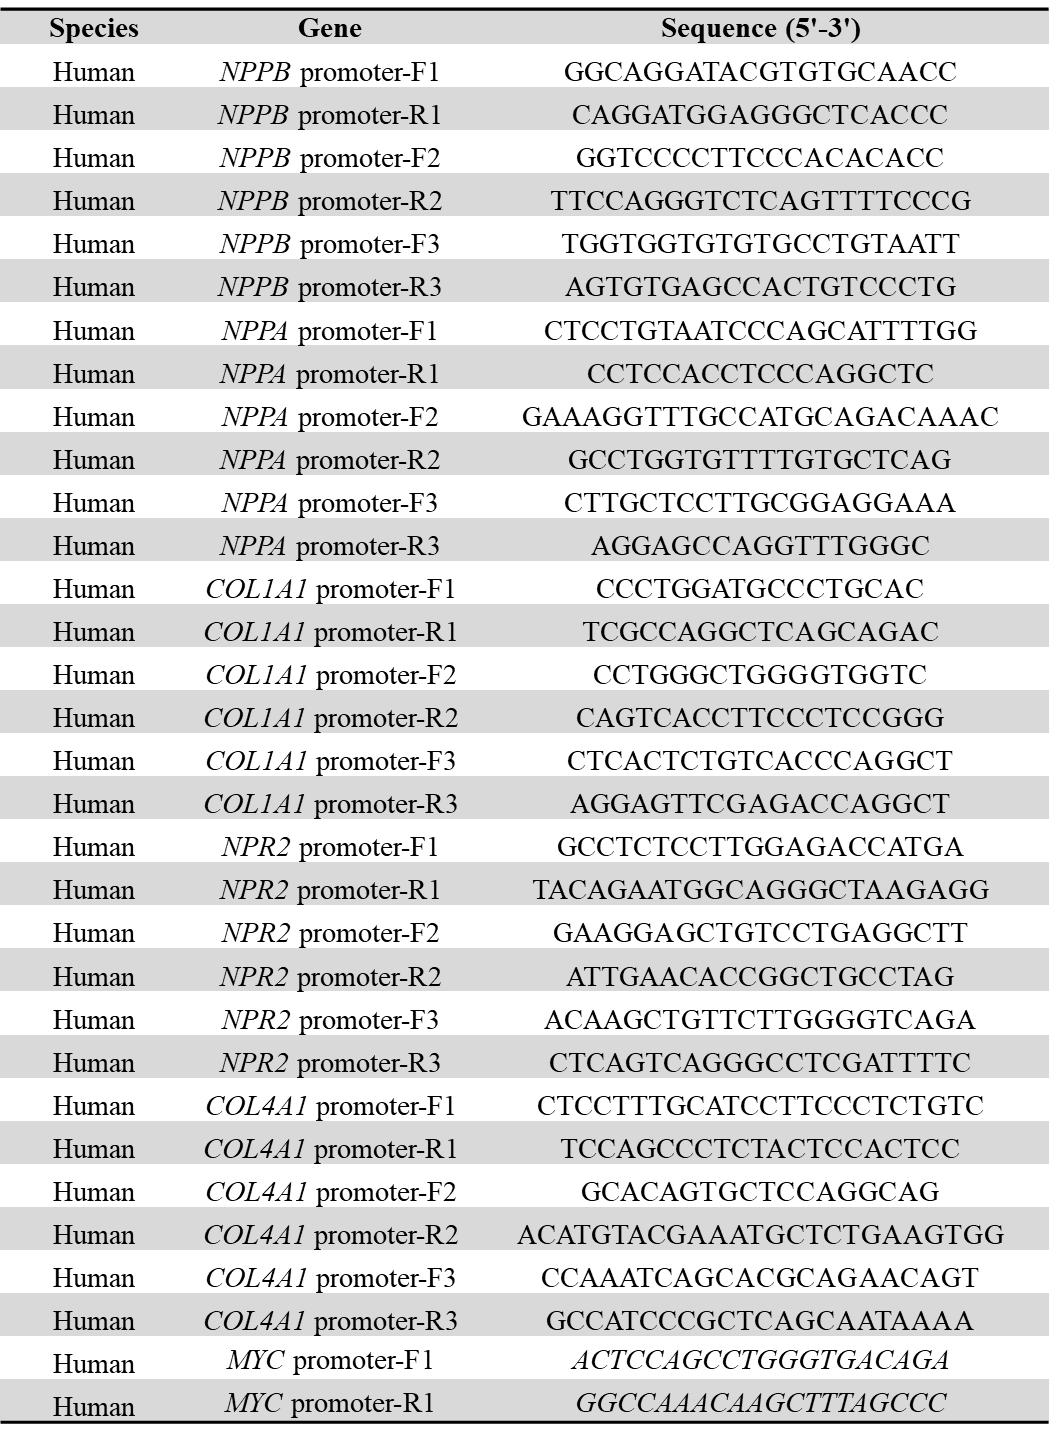


**Supplementary Table 6 (continued)**

Primers used for ChIP-qPCR


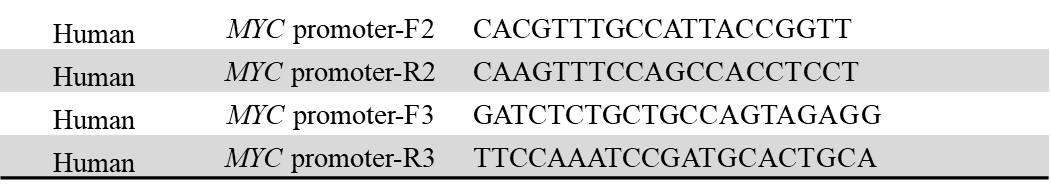


**Supplementary Figure 1**

**
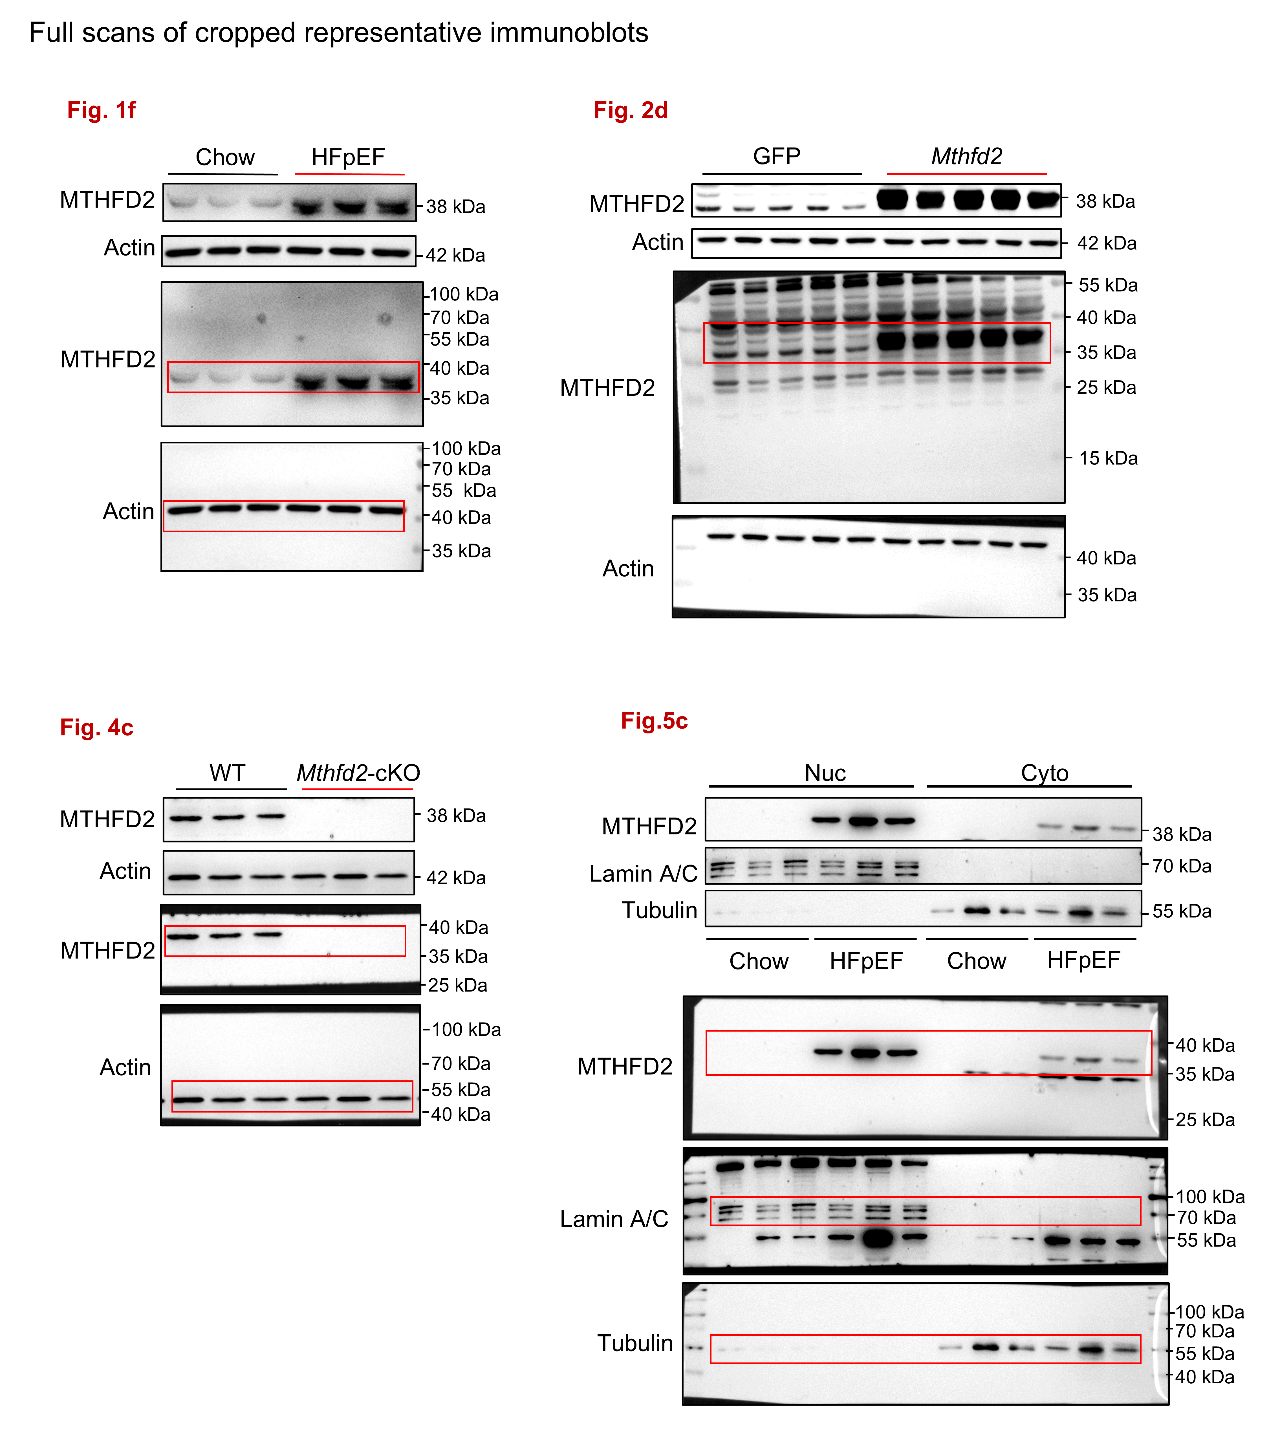
**

**Supplementary Figure 1 (continued)**


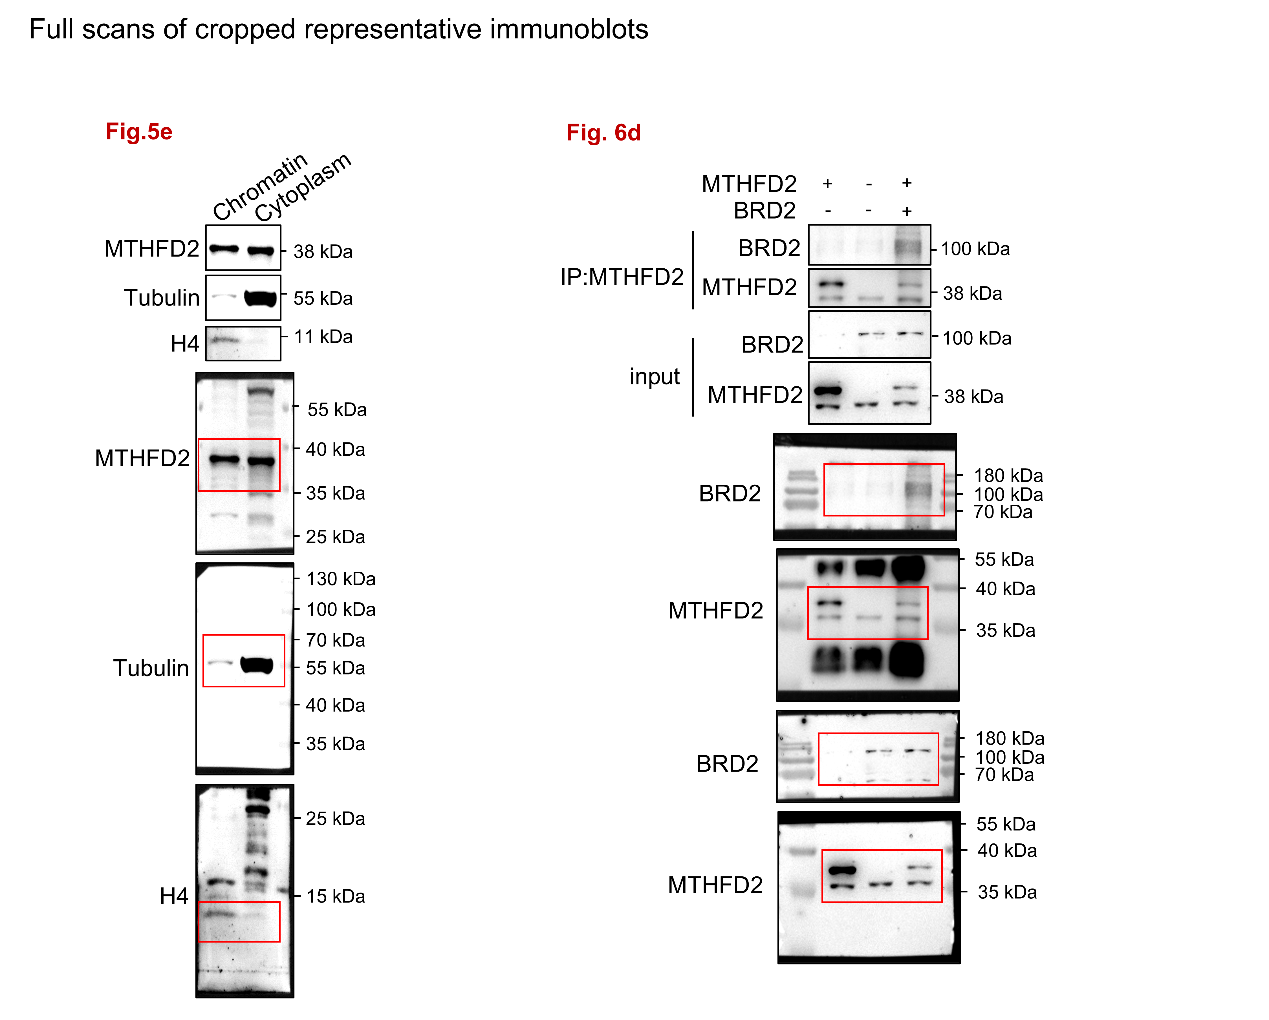


**Supplementary Figure 1 (continued)**


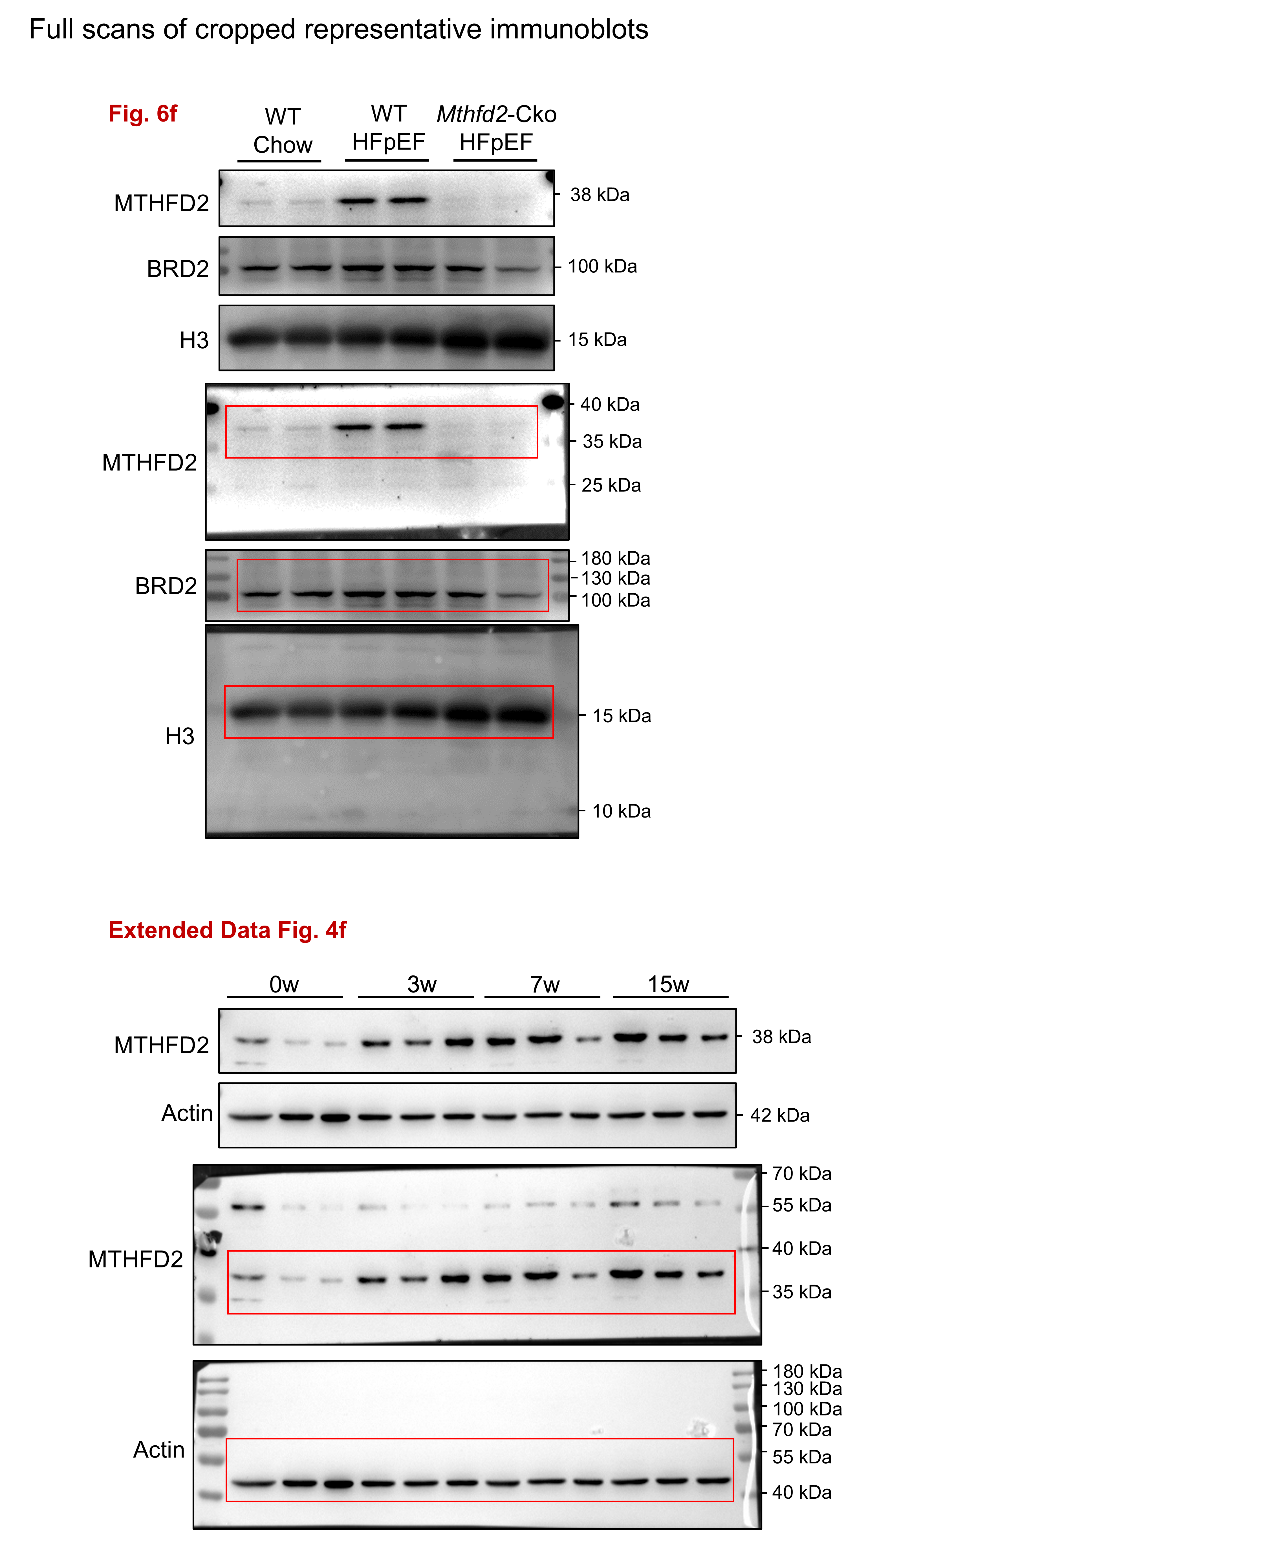


**Supplementary Figure 1 (continued)**

**
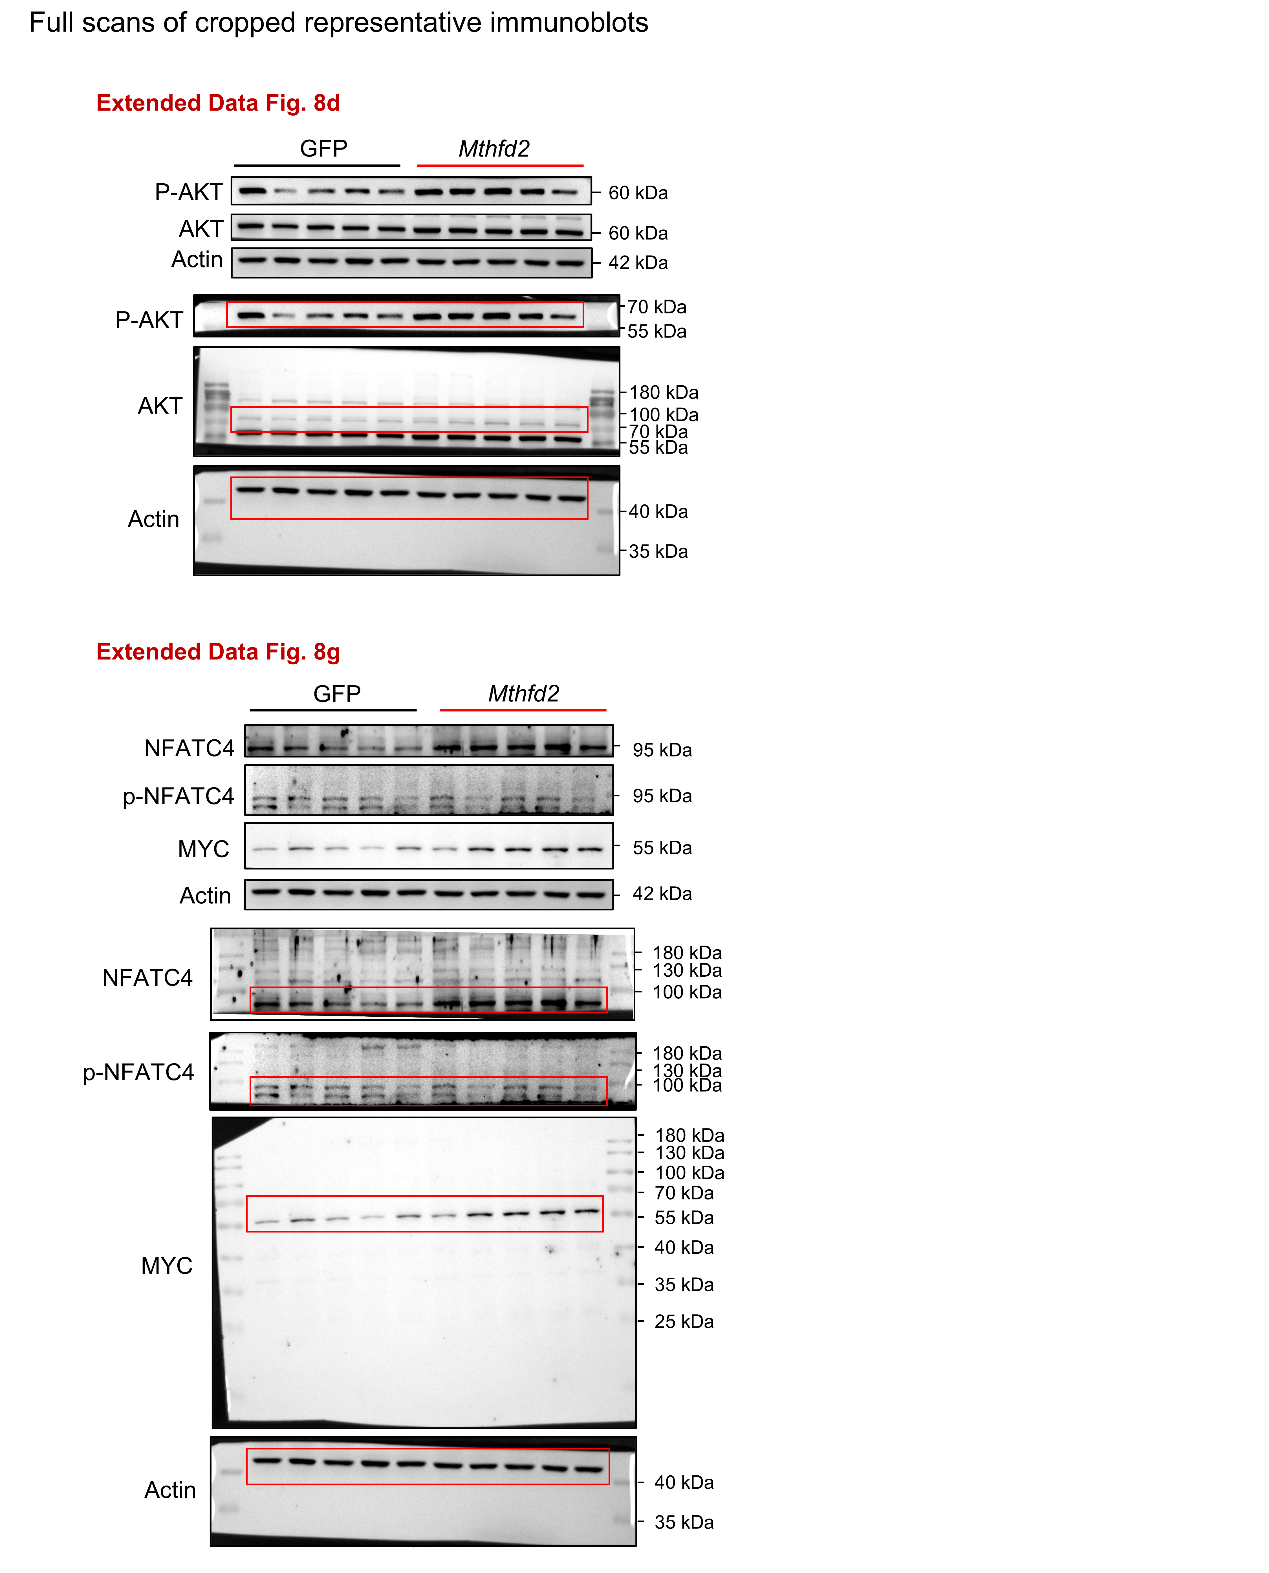
**

**Supplementary Figure 1 (continued)**


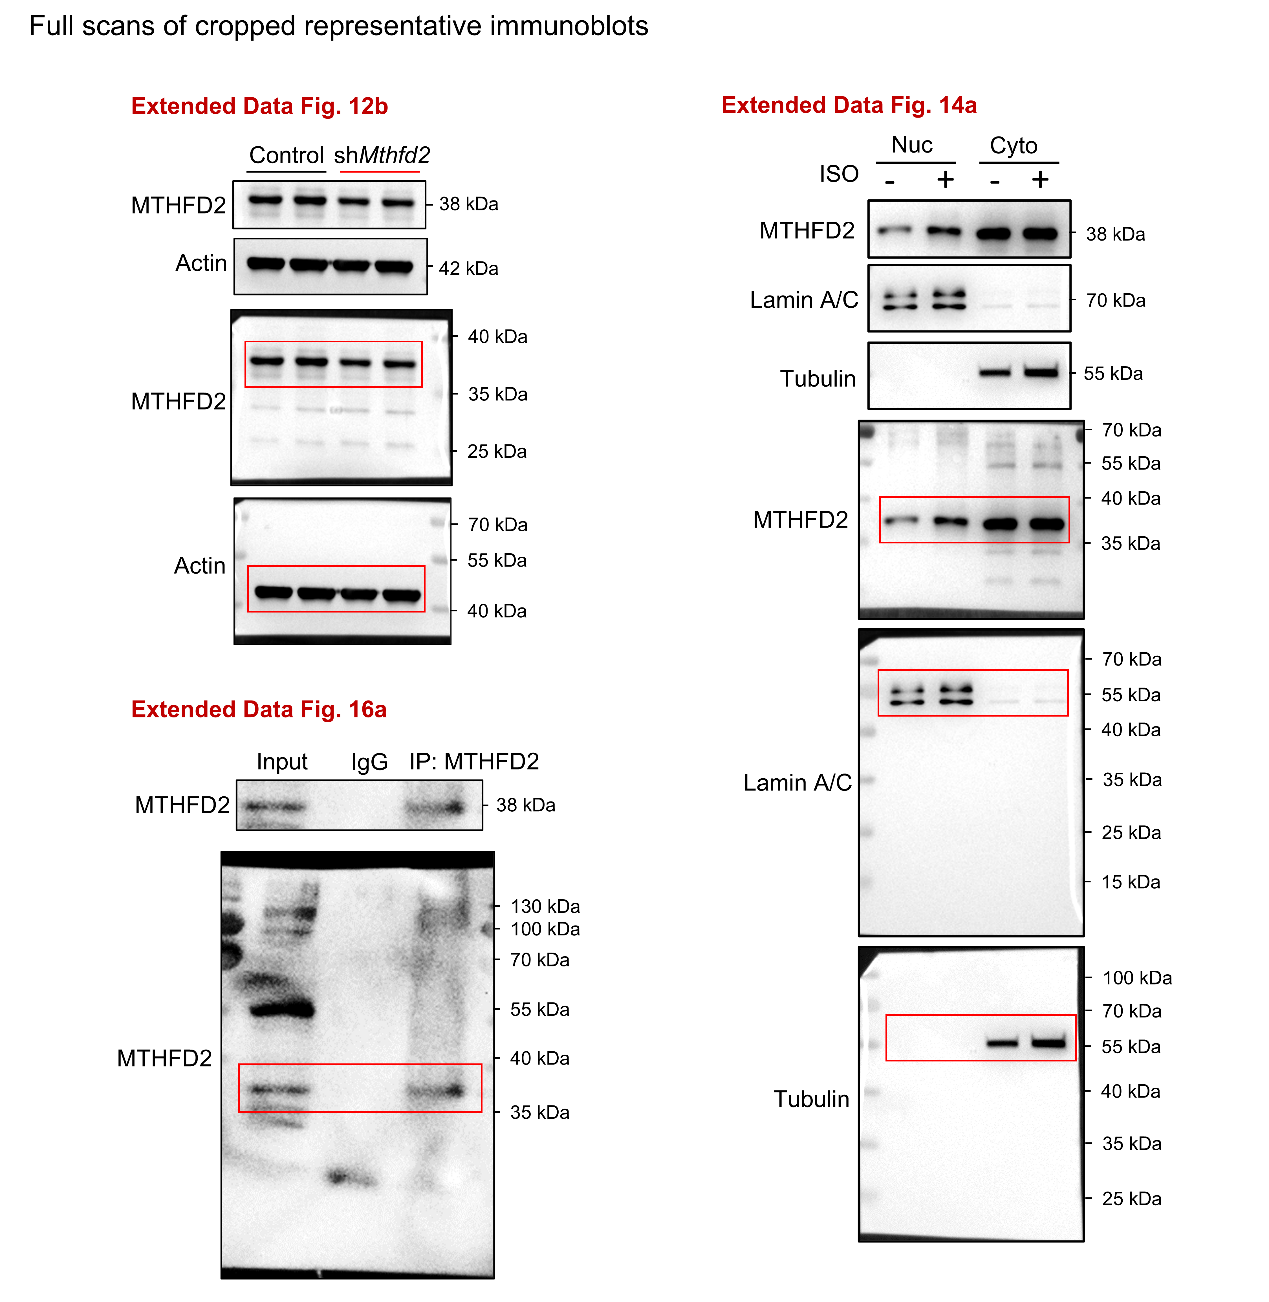


**Supplementary Figure 1 (continued)**


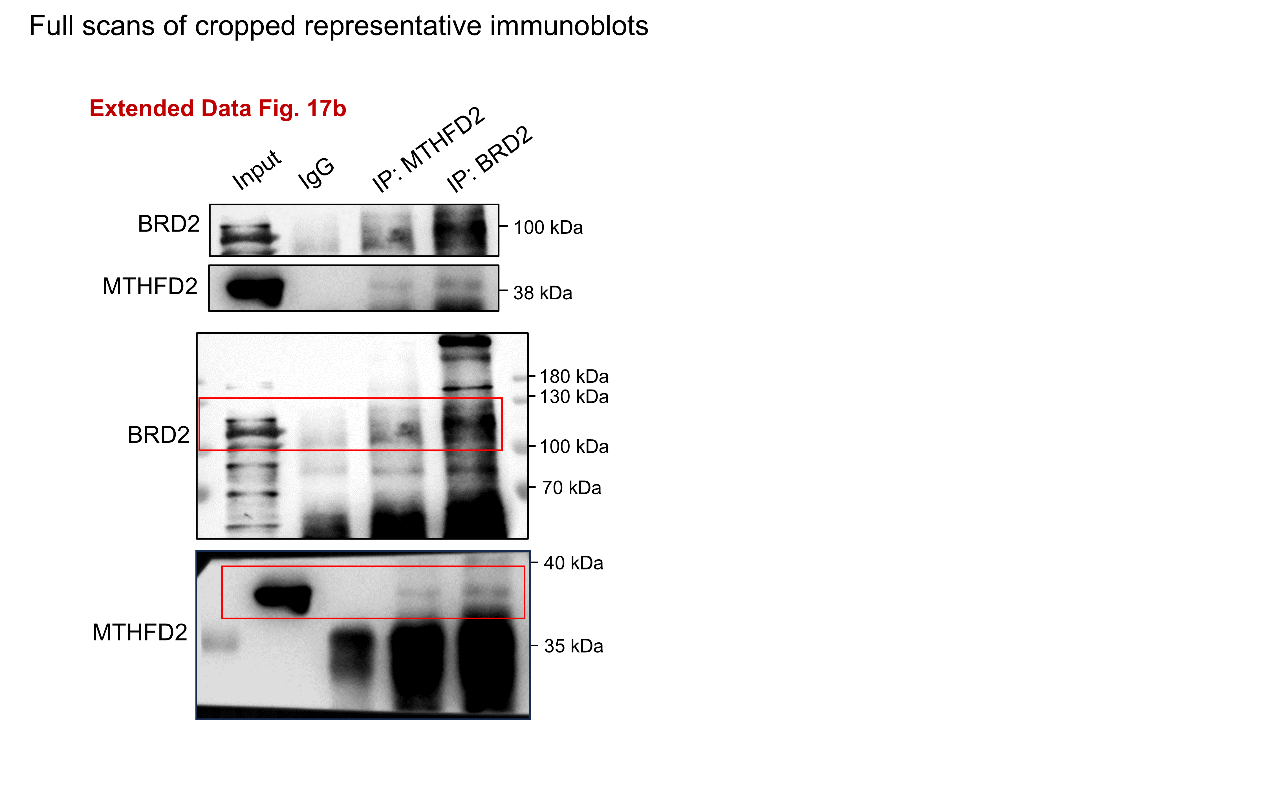

Supplement: Supplementary file 1 [file bab81bd3a28d3e1372783ba3.docx]
